# Supplementary material for: Investigating physician leadership competencies in rural and remote areas of the province of Aceh, Indonesia
Source: HighWire-hosted journal article supplement (doi:10.1136/leader-2022-000633), 2022-11-15
Supplement: leader-2022-000633supp001_data_supplement.pdf [file leader-2022-000633supp001_data_supplement.pdf]

**Appendix 1****Interview guide**

Key questions:

1. What is/are your role(s) in your organisation (tell us about your work as a physician leader)?
2. What are the important elements of the physician leader role? (based on LEADS framework: Lead self, Engage others, Achieve results, Develop coalitions, and Systems transformation)
3. From your experience, what are the main challenges and barriers to building physician leadership competencies in rural and remote areas?
4. What leadership behaviour and competencies do you apply in practice?
5. What knowledge, skills and attitudes are needed by a physician who leads primary care teams in rural and remote areas?

**Appendix 2****Overview of themes and subthemes**

| Themes                                                       | Subthemes                                | Codes                                                    | Participants who mentioned this                                      |
|--------------------------------------------------------------|------------------------------------------|----------------------------------------------------------|----------------------------------------------------------------------|
| Qualities of a good physician leader commensurate with LEADS | Being culturally sensitive               | Sociocultural                                            | 1, 2, 3, 4, 5, 6, 8, 9, 11, 12, 14, 15, 16, 17, 18 (N=15)            |
|                                                              |                                          | Communication skills                                     | 1, 2, 3, 4, 5, 6, 7, 8, 9, 10, 11, 12, 13, 14, 15, 16, 17, 18 (N=18) |
|                                                              |                                          | Listening skills                                         | 2, 3, 5, 6, 7, 9, 13, 14, 15, 16, 18 (N=11)                          |
|                                                              |                                          | Community collaborative engagement                       | 1, 2, 3, 4, 5, 6, 8, 9, 10, 11, 12, 13, 14, 15, 16, 18 (N=16)        |
|                                                              | Having a strong character (perseverance) | Courage                                                  | 3, 9, 11, 14, 15, 17, 18 (N=7)                                       |
|                                                              |                                          | Determination                                            | 1, 2, 3, 7, 9, 10, 11, 12, 13, 14, 15, 16, 17, 18 (N=14)             |
|                                                              |                                          | Building trust                                           | 1, 2, 5, 6, 7, 8, 9, 10, 12, 13, 16, 17, 18 (N=13)                   |
|                                                              | Being creative and flexible              | Geographical barriers                                    | 1, 3, 4, 6, 8, 9, 10, 11, 12, 14, 15, 17, 18 (N=13)                  |
|                                                              |                                          | Limited material/healthcare resources                    | 1, 3, 4, 8, 9, 11, 12, 13, 18 (N=9)                                  |
|                                                              |                                          | Difficulties in expanding their knowledge and competence | 18 (N=1)                                                             |
|                                                              |                                          | Limited health workforce                                 | 1, 3, 4, 6, 8, 9, 10, 12, 15, 16, 17, 18 (N=12)                      |
|                                                              |                                          | Social rejection                                         | 17 (N=1)                                                             |
|                                                              |                                          | Illiteracy problem in community                          | 1, 2, 3, 4, 5, 7, 8, 11, 12, 13, 14, 15, 16, 17, 18 (N=15)           |
| Ability to perform multiple tasks (versatility)              | Responsibilities                         | Dual role                                                | 1, 2, 4, 5, 6, 8, 9, 10, 11, 12, 13, 14, 15, 16, 17, 18 (N=16)       |
|                                                              |                                          | Multitasking                                             | 1, 4, 5, 7, 8, 9, 11, 14, 15, 17, 18 (N=11)                          |

**Appendix 3****Perceived needs (N=18)**

| Domain          | Subdomain – A competent leader..                                                                                                                                                                                                                         | Total respondents who responded this | Category |
|-----------------|----------------------------------------------------------------------------------------------------------------------------------------------------------------------------------------------------------------------------------------------------------|--------------------------------------|----------|
| Lead self       | is aware of their own assumptions, beliefs and principles                                                                                                                                                                                                | N=5                                  | Low      |
|                 | is aware of their own strengths and limitations                                                                                                                                                                                                          | N=10                                 | Moderate |
|                 | takes responsibility for their own performance                                                                                                                                                                                                           | N=13                                 | High     |
|                 | takes responsibility for their own health                                                                                                                                                                                                                | N=7                                  | Moderate |
|                 | actively seeks opportunities and challenges for personal learning, character building and growth                                                                                                                                                         | N=10                                 | Moderate |
|                 | models qualities such as honesty, integrity, resilience and confidence                                                                                                                                                                                   | N=15                                 | High     |
|                 | is genuine and passionate                                                                                                                                                                                                                                | N=10                                 | Moderate |
|                 | gains the respect of their community members and peers                                                                                                                                                                                                   | N=1                                  | Low      |
|                 | is comfortable in their own shoes                                                                                                                                                                                                                        | N=9                                  | Moderate |
|                 | understands when is the right time to pass on information                                                                                                                                                                                                | N=9                                  | Moderate |
|                 | knows who they are, where they come from and is proud of that grounding, for it is their identity                                                                                                                                                        | None                                 | Low      |
| Engage others   | supports and challenges others to achieve professional goals                                                                                                                                                                                             | N=6                                  | Moderate |
|                 | supports and challenges others to achieve personal goals                                                                                                                                                                                                 | None                                 | Low      |
|                 | creates engaging environments in which others have meaningful opportunities to contribute                                                                                                                                                                | N=14                                 | High     |
|                 | ensures that resources are available to fulfil expected responsibilities                                                                                                                                                                                 | N=5                                  | Low      |
|                 | listens well and encourages an open exchange of information and ideas using appropriate communication media                                                                                                                                              | N=13                                 | High     |
|                 | facilitates environments of collaboration and cooperation to achieve results                                                                                                                                                                             | N=15                                 | High     |
|                 | Leadership is fostered across the community                                                                                                                                                                                                              | N=8                                  | Moderate |
|                 | wants to hear the information first-hand                                                                                                                                                                                                                 | N=1                                  | Low      |
|                 | takes time to digest what they are hearing                                                                                                                                                                                                               | N=2                                  | Low      |
|                 | listens more, talks less and asks questions                                                                                                                                                                                                              | N=3                                  | Low      |
|                 | represents active listening                                                                                                                                                                                                                              | N=8                                  | Moderate |
|                 | encourages the community to take the lead                                                                                                                                                                                                                | N=2                                  | Low      |
|                 | wants to understand the commitment being made and to be assured it will have a positive effect on their community                                                                                                                                        | N=12                                 | High     |
| Achieve results | inspires vision by identifying, establishing and communicating clear and meaningful expectations and outcomes                                                                                                                                            | N=12                                 | High     |
|                 | integrates organisational missions and values with reliable, valid evidence to make decisions                                                                                                                                                            | N=9                                  | Moderate |
|                 | acts in a manner consistent with organisational values to provide effective and efficient public-centred service                                                                                                                                         | N=11                                 | High     |
|                 | assesses and evaluates outcomes                                                                                                                                                                                                                          | N=13                                 | High     |
|                 | compares the results against established benchmarks                                                                                                                                                                                                      | N=3                                  | Low      |
|                 | corrects the course as appropriate                                                                                                                                                                                                                       | N=4                                  | Low      |
|                 | invites the community to set the direction                                                                                                                                                                                                               | N=11                                 | High     |
|                 | creates a space where everyone has an opportunity to speak and learn from each other regardless of who they are                                                                                                                                          | N=9                                  | Moderate |
|                 | understands that cultural safety is more than a history lesson (it is about opening dialogue with many different people about wellness; in this sense, the leader creates the appropriate conditions for this dialogue and joint learning to take place) | N=13                                 | High     |
|                 | must be in an environment that supports ownership and self-governance                                                                                                                                                                                    | N=1                                  | Low      |

|                        |                                                                                                                                                                                          |      |          |
|------------------------|------------------------------------------------------------------------------------------------------------------------------------------------------------------------------------------|------|----------|
| Develop coalitions     | creates connections, trust and shared meanings with individuals and groups                                                                                                               | N=13 | High     |
|                        | facilitates collaboration, cooperation and coalitions among diverse groups and perspectives with the aim to improve service                                                              | N=11 | High     |
|                        | employs methods to gather intelligence                                                                                                                                                   | N=10 | Moderate |
|                        | encourages an open exchange of information                                                                                                                                               | N=4  | Low      |
|                        | uses quality evidence to influence action across the system                                                                                                                              | N=2  | Low      |
|                        | shows a political astuteness (adeptly uses skills, knowledge and judgements to shape an environment that will influence the organisation's decision-making process)                      | N=7  | Moderate |
|                        | can negotiate through conflict                                                                                                                                                           | N=9  | Moderate |
|                        | can mobilise people                                                                                                                                                                      | N=1  | Low      |
|                        | can develop community trust (i.e. the community trusts that what they say is true)                                                                                                       | N=3  | Low      |
|                        | invests in getting to know the people in the community so that they learn more about how the community operates                                                                          | N=7  | Moderate |
|                        | nurtures relationships over time; rather than visiting the community once, the competent leader is dedicated to long-term relationships                                                  | N=6  | Moderate |
|                        | passes forward information and knowledge                                                                                                                                                 | N=7  | Moderate |
|                        | protects the wisdom of the past and uses it to educate the future                                                                                                                        | N=2  | Low      |
|                        | recognises that knowledge can come from many different sources                                                                                                                           | N=5  | Low      |
|                        | acknowledges that historic agreements have a key place in indigenous history and are therefore foundational to many conversations                                                        | N=2  | Low      |
| Systems transformation | thinks analytically and conceptually                                                                                                                                                     | N=7  | Moderate |
|                        | questions and challenges the status quo (thereby effecting positive change and fostering innovation)                                                                                     | N=15 | High     |
|                        | can identify issues, solve problems and design and implement effective processes across systems and stakeholders                                                                         | N=8  | Moderate |
|                        | creates a climate of continuous improvement and creativity aimed at systemic change                                                                                                      | N=14 | High     |
|                        | scans the environment for ideas, best practices, and emerging trends (and, in doing so, makes maximum use of the resources available)                                                    | N=9  | Moderate |
|                        | actively contributes to change processes that improve health service delivery                                                                                                            | N=7  | Moderate |
|                        | recognises that communities and nations need to be able to control their systems and make their own decisions                                                                            | N=1  | Low      |
|                        | aims to include all healthcare providers and indigenous people (is able to organise and manage a heterogeneous group, whilst respecting their uniqueness in an empathetic, unbiased way) | N=3  | Low      |
|                        | allows the community to set the agenda and priorities                                                                                                                                    | N=5  | Low      |
|                        | recognises that each community is unique, and that each community therefore requires a tailored approach; there is no one size fits all                                                  | N=9  | Moderate |
|                        | realises that today's decisions impact the leaders of tomorrow as well as their future quality of life                                                                                   | N=5  | Low      |
|                        | acknowledges that health transformation pushes limits to promote required changes                                                                                                        | N=5  | Low      |
|                        | accounts for and modifies timelines, so as not to rush community decision-making                                                                                                         | N=1  | Low      |
